# Supplementary material
Source: PubMed Central journal article supplement (PMC5033645)
Supplement: NIHMS787259-supplement-2.pdf [file NIHMS787259-supplement-2.pdf]

## Supplementary Table 1

Water-mediated interactions in the SV2C glycan–HcA interface

| Water # | Distance (Å) | Water # | SV2C N559-glycan | HcA (or SV2C)     |
|---------|--------------|---------|------------------|-------------------|
| W1      | 3.15         | W2      |                  |                   |
|         | 3.04         |         |                  | F953 [N]          |
|         | 3.04         |         |                  | N954 [N]          |
|         | 2.79         |         |                  | S957 [OG]         |
|         | 2.97         |         |                  | D1062 [OD2]       |
| W2      | 2.90         |         | NAG603 [O7]      |                   |
|         | 2.67         |         |                  | D1062 [OD2]       |
|         | 2.76         |         |                  | R1065 [NH2]       |
| W3      | 2.62         |         | NAG603 [O3]      |                   |
|         | 3.15         |         | BMA604 [O6]      |                   |
|         | 2.77         |         |                  | H1064 [O]         |
| W4      | 2.84         |         | FUC601 [O2]      |                   |
|         | 3.39         |         | NAG602 [O6]      |                   |
|         | 2.70         |         | NAG603 [N2]      |                   |
|         | 2.66         |         |                  | D1289 [O]         |
| W5      | 2.61         |         | FUC601 [O2]      |                   |
|         | 3.40         |         | FUC601 [O3]      |                   |
|         | 2.69         |         |                  | D1289 [OD1]       |
| W6      | 2.79         | W7      |                  |                   |
|         | 2.66         |         |                  | Y1155 [OH]        |
|         | 2.84         |         |                  | D1288 [O]         |
|         | 3.02         |         |                  | G1292 [N]         |
| W7      | 2.84         |         | FUC601 [O4]      |                   |
|         | 3.38         |         | FUC601 [O5]      |                   |
|         | 2.60         |         |                  | E1293 [O]         |
| W8      | 3.32         |         | NAG602 [O7]      |                   |
|         | 2.80         |         |                  | D539 [OD2] – SV2C |
| W9      | 2.95         | W10     |                  |                   |
|         | 2.96         |         |                  | F953 [O]          |
|         | 2.67         |         |                  | T1145 [OG1]       |
|         | 3.12         |         |                  | N559 [OD1] – SV2C |
| W10     | 2.36         |         | NAG602 [N2]      |                   |
