# Supplementary material
Source: PubMed Central journal article supplement (PMC5033645)
Supplement: NIHMS787259-supplement-3.pdf [file NIHMS787259-supplement-3.pdf]

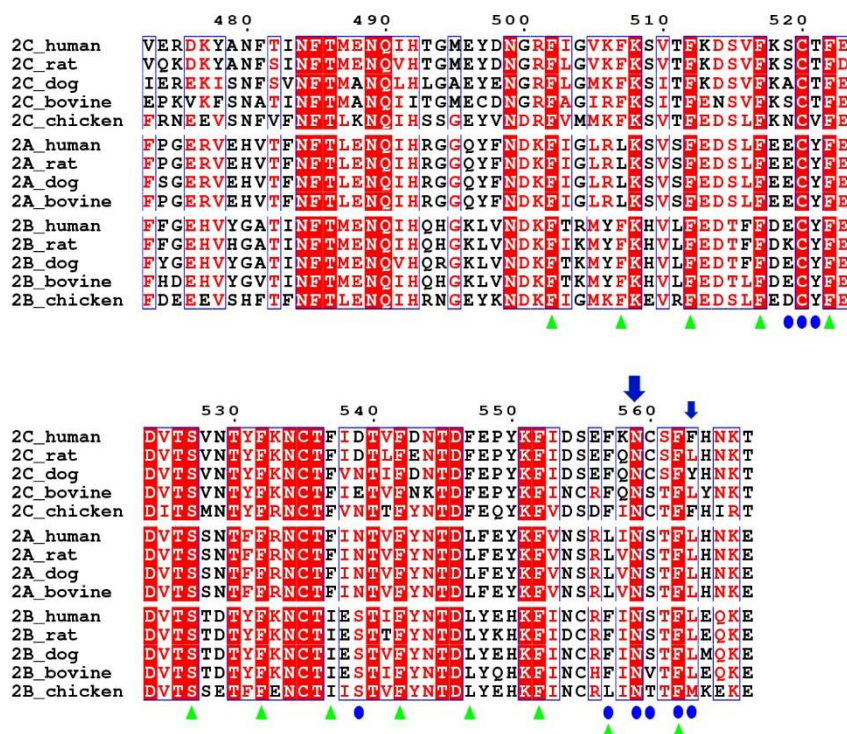

## Supplementary Note 1

Sequence alignment of SV2s in the loop 4 region.

Representative sequences of SV2A, SV2B, and SV2C were selected from different species: human SV2A (NP\_055664.3), 2B (CAG33367.1), 2C (AAI00828.1); rat SV2A (NP\_476558.2), 2B (NP\_476555.1), 2C (NP\_113781.1); dog SV2A (XP\_003639668.1), 2B (XP\_005618386.1), 2C (XP\_546060.2); bovine SV2A (NP\_776387.1), 2B (NP\_001076917.1), 2C (NP\_001178948.1); chicken SV2B (XP\_425081.2), 2C (XP\_429151.3). Sequence alignments were made using Clustal Omega (Sievers, F. et al., *Mol Syst Biol* **7**, 539, 2011) and ESPrict (Gouet, P. et al., *Bioinformatics* **15**, 305–8, 1999). Only the truncated loop 4 of SV2 is shown for clarity. Identical residues are indicated with white letters on a red background, similar conserved residues are in red letters, varied residues are in black letters. The residues of SV2C that directly bind to H<sub>c</sub>A are indicated by blue ovals; the pentapeptide-repeat is labeled by green triangles. The N-linked glycosylation site, N559, is highly conserved, but not F563 (blue arrows).

880 890 900 910 920

BoNT/A1 NIINTSILNLRYES.NHLIDLSRYASKINIGSRVNFDPIDKNOIQOLFPLESSKIEVILK  
 BoNT/A2 NIVNTSILSIVYKK.DDLIDLSRYGAKINIGDRVYYSIDKNOIKLPLESSKIEVILK  
 BoNT/A3 NIVNTSILSIVYKK.DDLIDLSRYGAKINIGDRVYYSIDKNOIKLPLESSKIEVILK  
 BoNT/A4 NITNASILSIVYKD.DDLIDLSRYGAEIYNGDKVYNSIDKNOIKLPLESSKIEVILK  
 BoNT/A5 NIINTSILNLRYES.NHLIDLSRYASEINIGSRVNFDPIDKNOIQOLFPLESSKIEVILK  
 BoNT/A6 NIINTSILSLRYEN.NHLIDLSRYASKINIGSRVNFDPIDKNOIQOLFPLESSKIEVILK  
 BoNT/A7 NIINTSILNLRYES.NHLIDLSRYASKINIGSRVNFDPIDKNOIQOLFPLESSKIEVILK  
 BoNT/A8 NITNTSILSIVVDK.DGRIDLSRYGAEIYNGDKVSYNSIDKNOIKLPLESSKIEVILK  
 BoNT/HA ELKYNCILNLIKYEEMDRDKLVDSSGYRSRINIGTGVKFSIDKNOIQOLFPLESSKIEVILK

\*\*\*\*

930 940 950 960 970 980

BoNT/A1 NAIVNSMYENFSTSFWRIPKYFNSISLNNEYTINCIMENNSGWKVSINYG...EIIW  
 BoNT/A2 NAIVNSMYENFSTSFWRIPKYFNSISLNNEYTINCIMENNSGWKVSINYG...EIIW  
 BoNT/A3 NAIVNSMYENFSTSFWRIPKYFNSISLNNEYTINCIMENNSGWKVSINYG...EIIW  
 BoNT/A4 KAIVNSMYENFSTSFWRIPKYFNSISLNNEYTINCIMENNSGWKVSINYG...EIIW  
 BoNT/A5 NAIVNSMYENFSTSFWRIPKYFNSISLNNEYTINCIMENNSGWKVSINYG...EIIW  
 BoNT/A6 NAIVNSMYENFSTSFWRIPKYFNSISLNNEYTINCIMENNSGWKVSINYG...EIIW  
 BoNT/A7 NAIVNSMYENFSTSFWRIPKYFNSISLNNEYTINCIMENNSGWKVSINYG...EIIW  
 BoNT/A8 NAIVNSMYENFSTSFWRIPKYFNSISLNNEYTINCIMENNSGWKVSINYG...EIIW  
 BoNT/HA NGVIYNSMYENFSTSFWRIPKYFRN...INNEYKITSMONGNSGWEVSLNFSNMNSKIIW

\*\*\*\*

990 1000 1010 1020 1030 1040

BoNT/A1 TLDQTQEIQRVVFKYSQMINISDYINRWIEVITINNRLNNSKIYINGRLIDQKPISNLG  
 BoNT/A2 TLDQNKQNIQRVVFKYSQMVNISDYINRWIEVITINNRLTKSKYIINGRLIDQKPISNLG  
 BoNT/A3 TLDQNKQNIQRVVFKYSQMVNISDYINRWIEVITINNRLTKSKYIINGRLIDQKPISNLG  
 BoNT/A4 TLDQTQEIQRVVFKYSQMINISDYINRWIEVITINNRLTKSKYIINGRLIDQKPISNLG  
 BoNT/A5 TLDQNKQNIQRVVFKYSQMVNISDYINRWIEVITINNRLNNSKIYINGRLIDQKPISNLG  
 BoNT/A6 TLDQNKQNIQRVVFKYSQMVNISDYINRWIEVITINNRLTKSKYIINGRLIDQKPISNLG  
 BoNT/A7 TLDQNKQNIQRVVFKYSQMVNISDYINRWIEVITINNRLTKSKYIINGRLIDQKPISNLG  
 BoNT/A8 TLDQNKQNIQRVVFKYSQMVNISDYINRWIEVITINNRLTKSKYIINGRLIDQKPISNLG  
 BoNT/HA TLDTEGIKKTVVVQYTCNINISDYINRWIEVITINNRLNNSKIYINGRLINEESISDLG

1050 1060 1070 1080 1090 1100

BoNT/A1 NIHASNNIMFKLDGCRDTHRYIWKIYFNLFDKELNEKEIKDLYDNOSNSGILKDFWGDYL  
 BoNT/A2 NIHASNKIMFKLDGCRDPRRYIMIKYFNLFDKELNEKEIKDLYDSOSNSGILKDFWGNYL  
 BoNT/A3 NIHASNKIMFKLDGCRDPRRYIMIKYFNLFDKELNEKEIKDLYDSOSNSGILKDFWGNYL  
 BoNT/A4 NIHASNKIMFKLDGCRDPRRYIVIKYFNLFDKELSEKEIKDLYDNOSNSGILKDFWGDYL  
 BoNT/A5 NIHASNNIMFKLDGCRDTHRYIWKIYFNLFDKELNEKEIKDLYDNOSNSGILKDFWGNYL  
 BoNT/A6 NIHASNKIMFKLDGCRDPRRYIMIKYFNLFDKELNEKEIKDLYDSOSNSGILKDFWGNYL  
 BoNT/A7 NIHASNKIMFKLDGCRDPRRYILIKYFNLFDKELNEKEIKDLYDNOSNSGILKDFWGDYL  
 BoNT/A8 NIHASNNIMFKLDGCRDPRRYIVIKYFNLFDKELNEKEIKDLYDNOSNSGILKDFWGDYL  
 BoNT/HA NIHASNNIMFKLDGCRDPRRYIWKIYFNLFDKELNKEIKDLYDNOSNSGILKDFWGDYL

\*\* \*\*\*\*\*

1110 1120 1130 1140 1150 1160

BoNT/A1 QYDKFYMLNLYDPNKYVDVNNVGIIRGYMYLKGPRGSVMTTNIYLNLSLYRGTKFFIHKY  
 BoNT/A2 QYDKFYMLNLYDPNKYVDVNNVGIIRGYMYLKGPRGSVMTTNIYLNLSLYEGTKFFIHKY  
 BoNT/A3 QYDKFYMLNLYDPNKYVDVNNVGIIRGYMYLKGPRGSVMTTNIYLNLSLYMGTKFFIHKY  
 BoNT/A4 QYDKFYMLNLYDPNKYVDVNNVGIIRGYMYLKGPRDNVMTTNIYLNLSLYMGTKFFIHKY  
 BoNT/A5 QYDKFYMLNLYDPNKYVDVNNVGIIRGYMYLKGPRGSIVTTNIYLNLSLYMGTKFFIHKY  
 BoNT/A6 QYDKFYMLNLYDPNKYVDVNNVGIIRGYMYLKGPRSTLTTNIYLNLSLYMGTKFFIHKY  
 BoNT/A7 QYDKFYMLNLYDPNKYVDVNNVGIIRGYMYLKGPRGSVTTNIYLNLSLYMGTKFFIHKH  
 BoNT/A8 QYDKFYMLNLYDPNKYVDVNNVGIIRGYMYLKGPRGSVMTTNIYLNLSLYMGTKFFIHKY  
 BoNT/HA QYDKFYMLNLYDPNKYVDVNNVGIIRGYMYLKGPRGRIVTTNIYLNLSLYMGTKFFIHKY

▲ ▲ ▲ ▲ ▲

1170 1180 1190 1200 1210 1220

BoNT/A1 ASGNKDNIVRNNDRVYINVVVKNKEYRLATNASOAGVEKILSALEIPDVGNLSQVVMKS  
 BoNT/A2 ASGNKDNIVRNNDRVYINVVVKNKEYRLATNASOAGVEKILSALEIPDVGNLSQVVMKS  
 BoNT/A3 ASGNKDNIVRNNDRVYINVVVKNKEYRLATNASOAGVEKILSALEIPDVGNLSQVVMKS  
 BoNT/A4 ASGNKDNIVRNNDRVYINVVVKNKEYRLATNASOAGVEKILSALEIPDVGNLSQVVMKS  
 BoNT/A5 ASGNKDNIVRNNDRVYINVVVKNKEYRLATNASOAGVEKILSALEIPDVGNLSQVVMKS  
 BoNT/A6 ASGNKDNIVRNNDRVYINVVVKNKEYRLATNASOAGVEKILSALEIPDVGNLSQVVMKS  
 BoNT/A7 ASGNKDNIVRNNDRVYINVVVKNKEYRLATNASOAGVEKILSALEIPDVGNLSQVVMKS  
 BoNT/A8 ASGNKDNIVRNNDRVYINVVVKNKEYRLATNASOAGVEKILSALEIPDVGNLSQVVMKS  
 BoNT/HA ASGNKDNIVRNNDRVYINVVVKNKEYRLATNASOAGVEKILSALEIPDVGNLSQVVMKS

1230 1240 1250 1260 1270 1280

BoNT/A1 KNDQGITNKCKMNLQDNNNGNDIGFIFGHQFNNTAKLVASNWNRYQIERSSRTLGCSEWFI  
 BoNT/A2 KDDQGITRNKCKMNLQDNNNGNDIGFIFGHLYDNIAKLVASNWNRYQVGRASRTFGCSWEFI  
 BoNT/A3 KDDQGITRNKCKMNLQDNNNGNDIGFVGFHLYDNIAKLVASNWNRYQVGRASRTFGCSWEFI  
 BoNT/A4 KNDQGITNKCKMNLQDNNNGNDIGFIFGHQFNNTAKLVASNWNRYQIERSSRTLGCSEWFI  
 BoNT/A5 KNDQGITRNKCKMNLQDNNNGNDIGFIFGHQFNNTDKLVASNWNRYQIERSSRTFGCSWEFI  
 BoNT/A6 KNDQGITRNKCKMNLQDNNNGNDIGFIFGHKFNIDYKLVASNWNRYQIEISRTFGCSWEFI  
 BoNT/A7 KNDQGITRNKCKMNLQDNNNGNDIGFIFGHQFNNTAKLVASNWNRYQIGKTSVTFGCSWELI  
 BoNT/A8 KNDQGITRNKCKMNLQDNNNGNDIGLIFGHQFNNTAKLVASNWNRYQVGRASRTFGCSWEFI  
 BoNT/HA ENDQGITRNKCKMNLQDNNNGNDIGFIFGHQFNNTAKLVASNWNRYQIGKASRTFGCSWEFI

1290

BoNT/A1 PVDDCWGERPFL  
 BoNT/A2 PVDDCWGESLFL  
 BoNT/A3 PVDDCWGESLFL  
 BoNT/A4 PVDDCWGERPFL  
 BoNT/A5 PVDDCWGESFLL  
 BoNT/A6 PVDDCWGESFLL  
 BoNT/A7 PVDCWGESLFL  
 BoNT/A8 PVDDCWGESLFL  
 BoNT/HA PVDDCWGESLFL

★ ★ ★ ▲

## Supplementary Note 2

Sequence alignment among eight BoNT/A subtypes and BoNT/HA.

The amino acid sequence of BoNT/A1-A8 and HA are taken from GenBank: AAQ06331.1 (A1), ACO83782.1 (A2), ABA29017.1 (A3), ACQ51417.1 (A4), ACG50065.1 (A5), ACW83608.1 (A6), AFV13854.1 (A7), AJA05787.1 (A8), and KGO15617.1 (HA). Key H<sub>C</sub>A residues that are recognized by antibody CR1 (PDB code: 2NYY) (Garcia-Rodriguez, C. et al., *Nat Biotechnol* **25**, 107–16, 2007) are indicated by black stars. H<sub>C</sub>A residues that directly interact with SV2C peptide or the N559-glycan are labeled by blue triangles or yellow ovals, respectively.
